# Supplementary material for: Xenograft of bio-3D printed scaffold-free cartilage constructs derived from human iPSCs to regenerate articular cartilage in immunodeficient pigs
Source: Research Square preprint supplement (doi:10.21203/rs.3.rs-4615138/v1), 2024-07-24
Supplement: Supplementary file 1 [file 74e4a4e7a5b3dc68d2a5aef2.xlsx]

## Sheet: Sheet1
Tissue	Strength（N）	Pa＝N/mm2
Implant1	53.3	16.9664					1				construct	implant	cartilage
Implant2	159.3	50.7083					1				0.136877	16.9664	97.151
Implant3	135.9	43.2596					1				0.226007	50.7083	75.2507
Implant4	189	60.1623					1				0.267388	43.2596	77.8609
Implant5	128.1	40.7767	42.3747				1				0.190992	60.1623	36.8295
native1	305.2	97.151					1				0.120961	40.7767	31.1635
native2	236.4	75.2507					2				0.178259
native3	244.6	77.8609					2			sample	6	5	5
native4	115.7	36.8295					2			平均値	0.186747	42.3747	63.6511
native5	97.9	31.1635	63.6511				2			標準偏差	0.0499152	14.3859	25.4305
construct1	0.43	0.136877					2			標準誤差	0.0223227	7.19293	12.7153
construct2	0.71	0.226007					3			95&信頼区間用エラー	0.0573824	19.9708	35.3032
construct3	0.84	0.267388					3
construct4	0.6	0.190992					3
construct5	0.38	0.120961					3
construct6	0.56	0.178259	0.186747				3
